# Supplementary material for: Satellite mapping of PM 2.5 episodes in the wintertime San Joaquin Valley: a “static” model using column water vapor
Source: Copernicus journal article supplement (doi:10.5194/acp-20-4379-2020), 2020-04-15
Supplement: Supplementary file 1 [file acp-20-4379-2020-supplement.pdf]

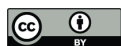

*Supplement of*

## **Satellite mapping of PM<sub>2.5</sub> episodes in the wintertime San Joaquin Valley: a “static” model using column water vapor**

**Robert B. Chatfield et al.**

*Correspondence to:* Robert B. Chatfield ([chatfield@alumni.rice.edu](mailto:chatfield@alumni.rice.edu))

The copyright of individual parts of the supplement might differ from the CC BY 4.0 License.

Included below are three portions of a poster presented by Michael Shook at the American Geophysical Union (Shook et al., 2013) soon after the DISCOVER-AQ measurements in California. That work gave a syncretic overview of many trace species measurement besides water vapor which motivated our investigation, as described in Section 1.1.. First, there is an acknowledgement of the many authors contributing measurements. Second, there is an explanation of methods of estimating a characteristic mixed layer height as observed of airplane measurements. Third, there are graphs of vertical profiles normalized by average tracer concentration and also by the depth of the mixed layer. The commonalities and some differences of the first tracer shown (water vapor) and the last (particulate scattering).

Acknowledgement to M.Kleb, G Chen, B.E. Anderson, J. Barrick, G. Diskin, A. Fried, E. Buzzay, D. Van Gilst, A. Weinheimer, M. Yang, D.H. Lenschow.

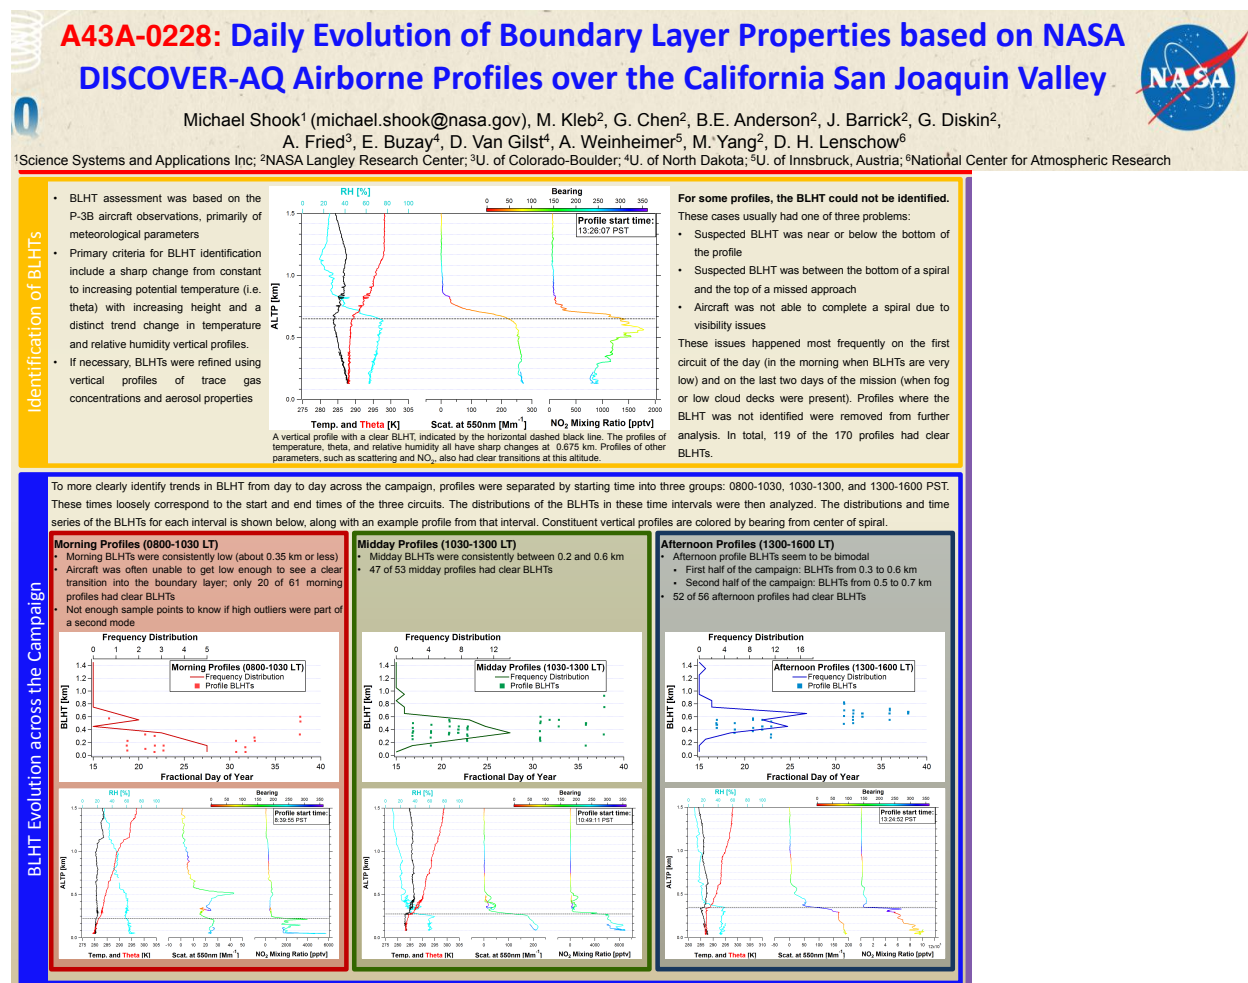

To visualize BL variability and vertical gradients, composite profiles for eight different constituents were created. Constituents were chosen to represent a variety of lifetimes and production/removal processes.

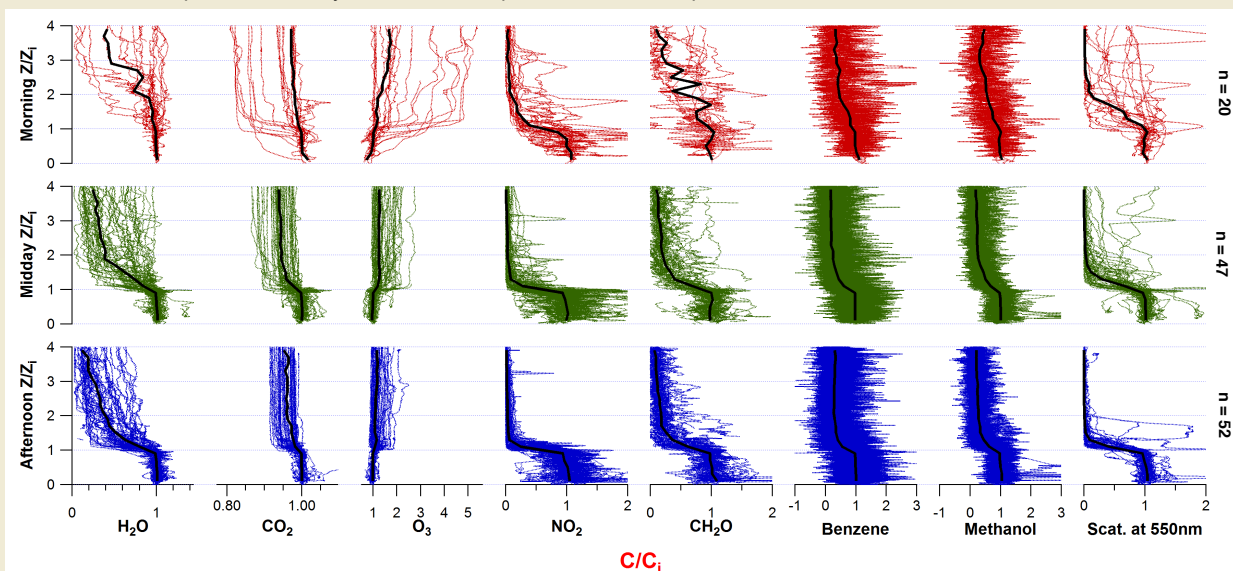

Composite profiles of different constituents scaled by the profile BLHT and the average concentration of the constituent within the boundary layer. The dotted, colored lines represent individual profiles, and the solid black lines represent the median profile for that constituent and time period. Z = pressure altitude, Z<sub>1</sub> = profile BLHT, C = constituent concentration, and C<sub>1</sub> = average constituent concentration in the boundary layer
